# Supplementary material for: Heuristics, Biases, and Decisions in Resource Allocation for Home Care Packages under Consumer Directed Care: A Systematic Review and Thematic Synthesis
Source: Hindawi journal article supplement (doi:10.1155/2023/4157055), 2023-07-11
Supplement: f1 [file 4157055.f1.zip]

Archive with 4 entries (4 files):
- APP 1 Search Strategy.docx
- APP 2 Qual Assessment (1).docx
- APP 3 CODEBOOK (1).docx
- APP 4 Paper to Theme (1).docx
