# Supplementary material for: Heuristics, Biases, and Decisions in Resource Allocation for Home Care Packages under Consumer Directed Care: A Systematic Review and Thematic Synthesis
Source: Hindawi journal article supplement (doi:10.1155/2023/4157055), 2023-07-11

Systematic Search Strategy

Recommended Databases (discussion with Librarian)

MEDICAL

- PubMed/Medline (this is where relevant articles in Step 4 come from)
- Embase
- Cochrane
- PsychInfo/Psychnet

MULTI-DISCIPLINARY

- Scopus
- Medline
- Web of Science
- Cinahl (Nursing)

ECONOMICS/BUSINESS

- Econlit
- ABI Inform

SEARCH STRINGS (https://sr-accelerator.com/#/polyglot)

Pub Med


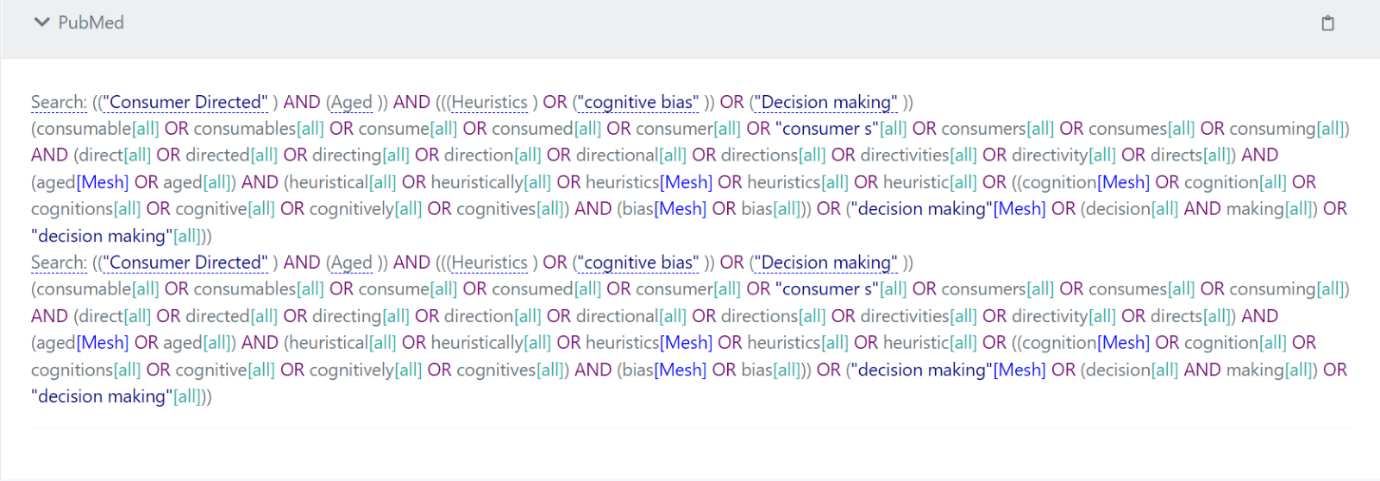


Embase


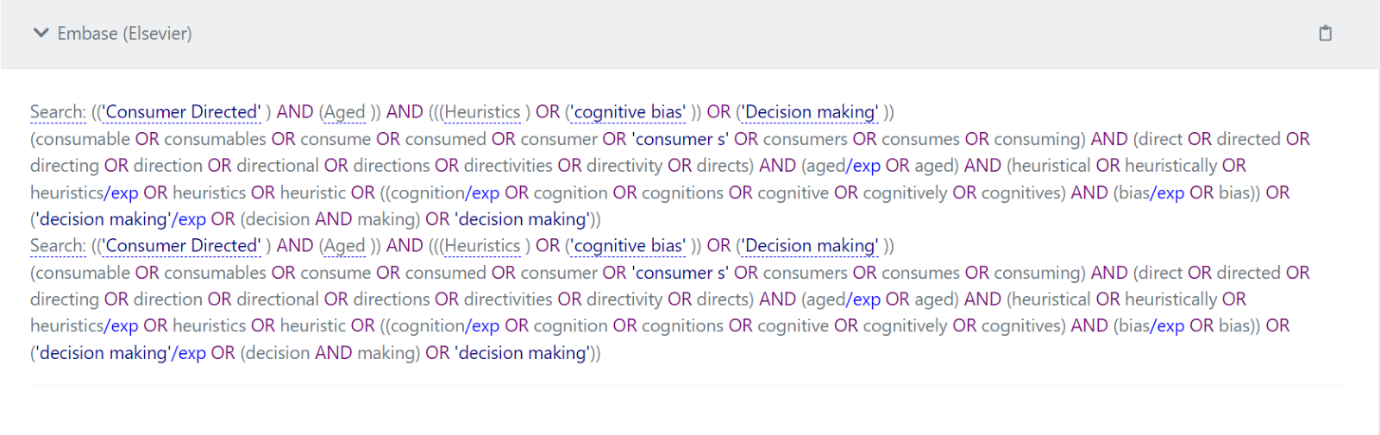


PscyhInfo


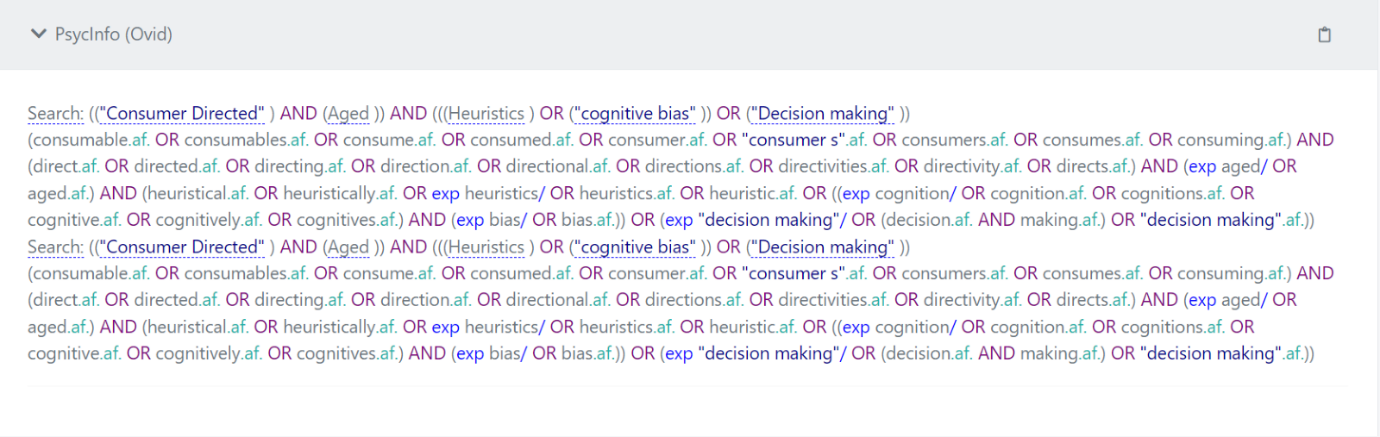


Scopus


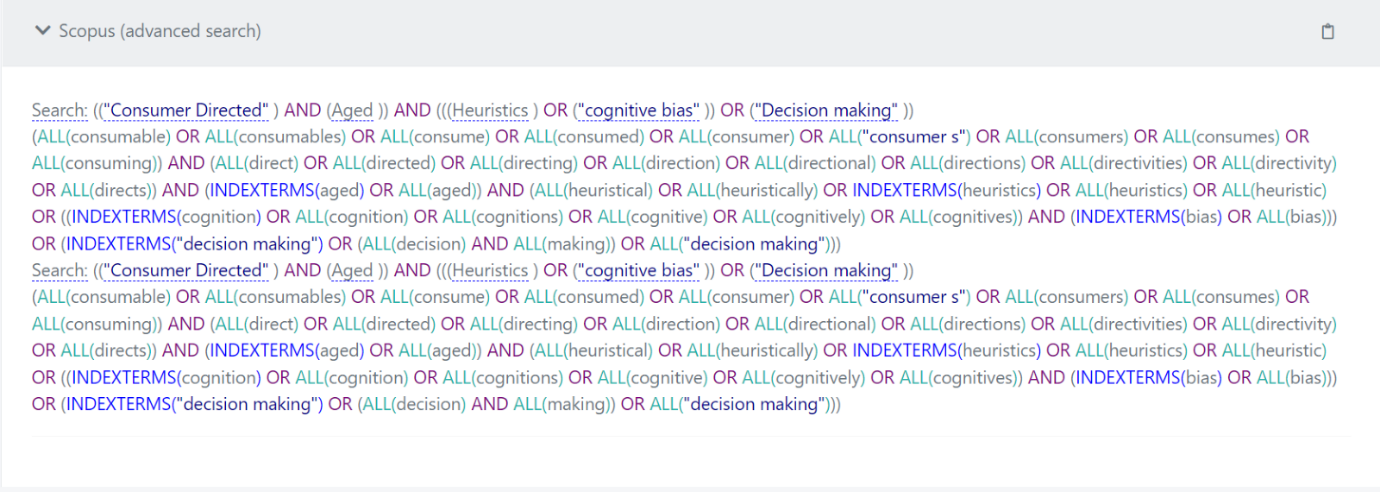


Web of Science


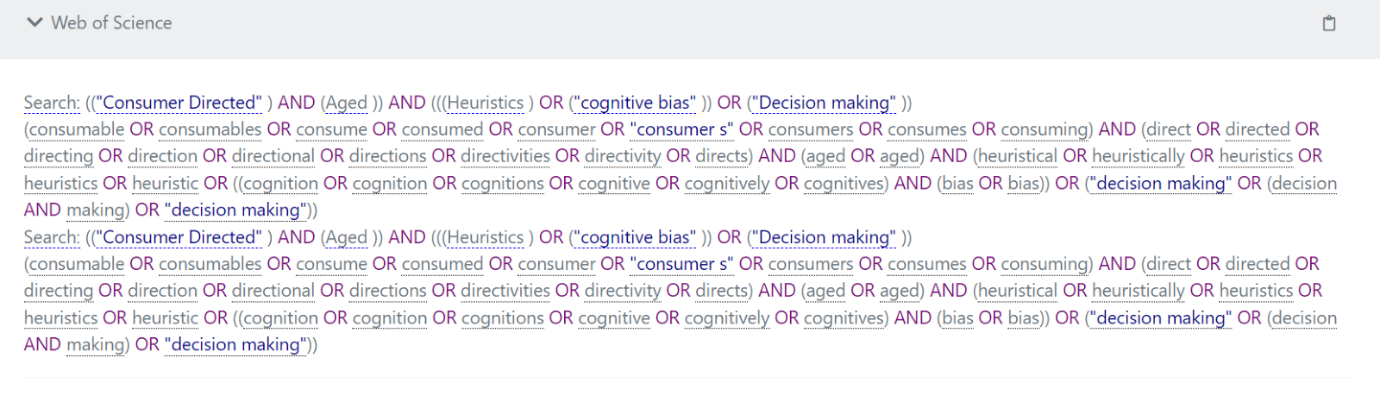


Cinahl


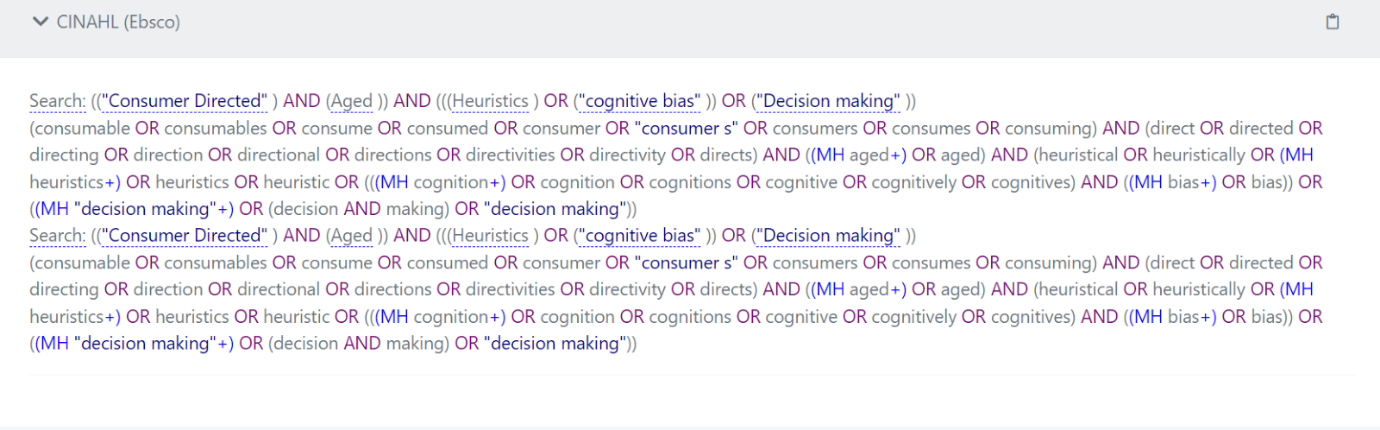


Econlit

Allocative Efficiency AND health care AND ( heuristics and biases ) OR decision making AND ( age 65 and older )

ABI-Inform (Proquest) –


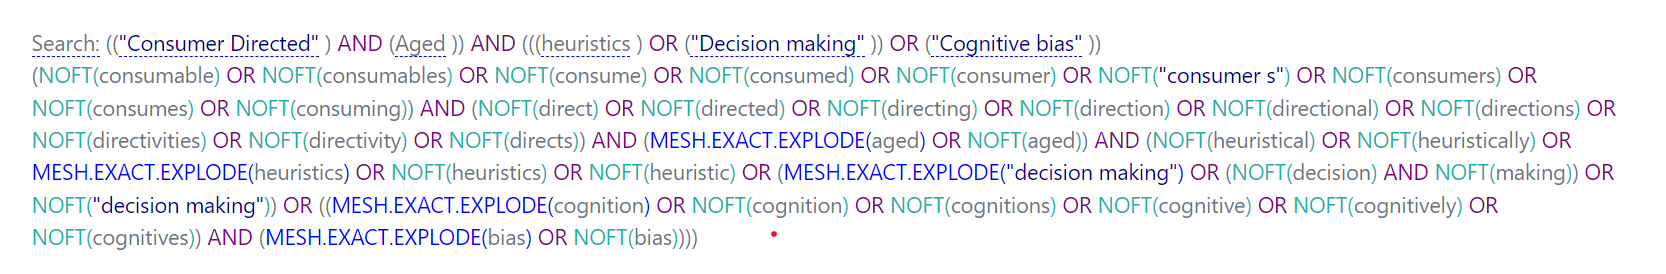

Supplement: f1 [file 4157055.f1.zip › APP 1 Search Strategy.docx]
