# Supplementary material for: Heuristics, Biases, and Decisions in Resource Allocation for Home Care Packages under Consumer Directed Care: A Systematic Review and Thematic Synthesis
Source: Hindawi journal article supplement (doi:10.1155/2023/4157055), 2023-07-11
Supplement: f1 [file 4157055.f1.zip › APP 2 Qual Assessment (1).docx]

| **Author** | **Research Questions** | **Data Support** |  |  |  |  |  |  |
| --- | --- | --- | --- | --- | --- | --- | --- | --- |
|  |  |  | **MIXED METHODS** | | | | |  |
| Author | Research Questions | Data Support | Rationale | Integration of components | Outputs correctly interpreted | Divergencies and inconsistencies | Qualitative criteria |  |
| Duner et al. (2019) | Y | Y | N | Y | Y | Y | Y |  |
|  |  |  | **QUALITATIVE** | | | | |  |
| Author | Research Questions | Data Support | Approach appropriate to question | Collection methods adequate | Findings | Interpretation of results | Coherence |  |
| Gill et al. (2018) | Y | Y | P | P | Y | Y | Y |  |
| Hillcoat-Nalletamby (2019) | Y | Y | Y | Y | Y | Y | Y |  |
| Rowland & Joyce (2020) | Y | Y | Y | P | Y | Y | Y |  |
| Rahja et al. (2021) | Y | Y | Y | Y | Y | Y | Y |  |
| Gill & Cameron (2022) | Y | Y | P | P | Y | Y | Y |  |
|  |  |  | **RANDOMISED CONTROLLED TRIALS (RCT)** | | | | |  |
| Author | Research Questions | Data Support | Randomisation | Comparability at base line | Complete data | Blinding | Participant Adherence |  |
| Elbel et al. (2014) | Y | Y | Y | Y | Y | N | Y |  |
| Wang et al. (2022) | Y | Y | Y | X | Y | N | Y |  |
|  |  |  | **QUANTITATIVE NON-RANDOM** | | | | |  |
| Author | Research Questions | Data Support | Representativeness | Measurements | Complete Data | Confounders | Administration of Interventions |  |
| Tymula et al. (2013) | Y | Y | Y | Y | Y | X | Y |  |
| McWilliam et al. (2007) | P | P | Y | Y | Y | Y | Y |  |
|  |  |  | **NARRATIVE REVIEW (SANRA)** | | | | | |
| Author | Research Questions | Data Support | Importance | Objectives | Search | Referencing | Reasoning | Presentation |
| Carpenter & Yoon (2011) | P | N | 2 | 2 | 0 | 2 | 0 | 2 |
