# Supplementary material for: Heuristics, Biases, and Decisions in Resource Allocation for Home Care Packages under Consumer Directed Care: A Systematic Review and Thematic Synthesis
Source: Hindawi journal article supplement (doi:10.1155/2023/4157055), 2023-07-11
Supplement: f1 [file 4157055.f1.zip › APP 3 CODEBOOK (1).docx]

| CODE |
| --- |
| Aging affects DM strategies |
| Aim of CDC and related policies to provide autonomy and choice |
| Anchoring |
| assumption that choice making is rational |
| assumption that consumers will seek information from external sources |
| assumption that decision making is static over the life course |
| assumption that improved experience improves outcomes |
| Assumption that older people want to be active participants |
| attitudes to spending varied immensely |
| Autonomous choice with support |
| autonomous decision-making does not mean without support |
| Autonomy can be a barrier |
| Average cost of different programs not significantly different |
| biases are evident in DM |
| Caring for someone in aged care adds experience for future DM |
| caution due to uncertainty |
| CDC can lower upfront costs |
| CDC may produce SE inequities |
| CDC not universally defined |
| CDC policy was only new |
| Choice and control can be challenging with cognitive decline |
| choice can be about what providers offer rather than what is wanted or needed |
| choice can be compromised by vulnerability and frailty |
| Choice can be restrained by what service provider is offering |
| choice deferral |
| choice is dynamic and longitudinal |
| choice is integral to decision-making |
| choice of care without intervention |
| Coding and data extraction |
| Cognitive Decline with Age |
| Come people would like to make the choice not to choose |
| Communication strategies insufficient |
| confusion when policy or models change |
| consumption patterns change with age |
| Costs or cost savings are not straight-forward |
| current funding model does not provide for best fit to consumer needs |
| Current situation not necessarily predictive of future outcomes |
| Decision aids can be simple |
| Decision environment affects decision making |
| Decision-making is complex |
| decisions are not made in a vacuum |
| Default options can improve decision quality |
| Different ways of examining DM bhaviour |
| distractions can be mitigated by information simplification |
| DM affected by age |
| DM as a couple |
| DM based on familiarity |
| DM capacity should be an assessment in itself |
| DM environment is uncertain |
| DM factors outside of budget |
| DM is a process |
| DM strategies and preferences are heterogeneous |
| don’t' want to risk missing out altogether |
| engagement reflects the degree of involvement in DM |
| environmental cues and decision aids can improve decision quality |
| Experience prevents persuasion from deception |
| Experiment limited by inability to understand mechanism behind choices |
| expertise improves decision quality |
| format and presentation matter |
| Future research is needed to determine effectiveness of interventions |
| General executive function declines with age |
| Generalisability is limited by small sample size |
| Generalizability limited to English speakers |
| Generational differences in approaches to decision making |
| heuristics and biases can be researched |
| Heuristics can be detrimental in health and financail decision-making |
| How best to support DM is unknown |
| Human decision making is not rational |
| Inclusion criteria |
| Increasing time allowed to make decision improves decision quality |
| Indigenous people are not represented in the study sample |
| Interview |
| Lack of awareness of options can lead to poor decisions |
| lack of clear messaging |
| leveraging affect can improve decisions |
| Leveraging heuristics can lead to manipulation by govt and private enterprise |
| Long-term memory unaffected by aging |
| loss aversion |
| many different frameworks to describe behaviour |
| many different models of care |
| many influences other than care on choice and flexibility |
| Marketisation of choice has pros and cons |
| Markets are not the only mechanism to provide choice |
| Meaning and relevance are important to older consumers |
| More choice is not necessarily better |
| normative point of view |
| not able to process information given |
| Not many studies that evaluate outcomes of CDC decisions |
| not understanding |
| Nudging can improve decision quality |
| Nudging did not change satisfaction |
| Numeracy aptitude is predictive, inversely proportional to heuristic recruitment |
| Older adults are capable of adaptive decision making |
| older adults are easily distracted |
| Older adults are more inconsistent with their choices |
| older adults are susceptible to framing and suggestion |
| Older adults are vulnerable decision makers |
| Older adults benefit from simpler choice |
| older adults can only complete one task at a time |
| older adults choose informal information sources |
| Older adults make better decisions in the daytime |
| Older adults more likely to be 'satisfisers' |
| Older adults need more time to make decisions |
| Older adults prefer fewer options |
| Older adults spend less time searching information |
| Older adults are not aware of range of choice they have |
| older people are grateful to receive any service |
| older people are more risk averse |
| older people can choose not to choose (status quo) |
| Older people defer difficult choices to family members or service providers |
| older people generally underspend |
| older people make decisions based on frequent or recent events |
| Older people make more emotionally driven decisions |
| Older people observed to think more heuristically |
| Older people tend to view situations more positively |
| older people would like to age at home |
| Participation in study was self-selected, therefore possible selection bias |
| Perception and reality are not always the same |
| Perception of understanding |
| Policy doesn't always meet aim |
| Preference for services 'for' rather than services 'with' |
| Preference is often to select things that are familiar |
| Pressure on industry for paradigm shift |
| Processing Speed |
| research needed in how to facilitate quality DM |
| Resource allocation |
| sample recruited from the same service |
| Self-determination with assistance |
| Service Provider susceptible to heuristic DM also |
| service providers are also biased |
| simple formats can improve decision making |
| simulations may not reflect reality |
| Some observations can't be explained |
| Standard economic theory is limited in ability to understand health and social care |
| Strategies can be used to improve decision-making quality for older adults |
| study did not consider existing services |
| Study limited by absence of cognitively impaired participants |
| study not random |
| Support for budgeting should be a separate event |
| Survey |
| tendency to avoid negative emotions |
| underspending increases feeling of security |
| underspending not a conscious decision |
| Understanding DM processes important for assessing policy |
| Useful information can improve decision quality |
| Wait times and lists are long for access to program |
| Working Memory declines with age |
| working memory for emotional information is unimpaired |
| Would like budget control but not aware of budget, statements or funds available |
| Writing things down is a decision aid |
