# Supplementary material for: Heuristics, Biases, and Decisions in Resource Allocation for Home Care Packages under Consumer Directed Care: A Systematic Review and Thematic Synthesis
Source: Hindawi journal article supplement (doi:10.1155/2023/4157055), 2023-07-11
Supplement: f1 [file 4157055.f1.zip › APP 4 Paper to Theme (1).docx]

| Paper | Decision-Making is Complex | Decision-making strategies are heterogenous | Decision-making changes over the life course | Research is needed | There are many different methods to evaluate decision-making | Consumer DM impact on resource allocation | Consumer DM implications for policy | Recommendations for improving or supporting decision-making under CDC |
| --- | --- | --- | --- | --- | --- | --- | --- | --- |
| Carpenter & Yoon (2011) | 18 | 5 | 58 | 2 | 0 | 0 | 0 | 21 |
| Dunér et al (2019) | 16 | 3 | 11 | 1 | 6 | 3 | 6 | 0 |
| Elbel et al (2014) | 2 | 3 | 4 | 6 | 4 | 0 | 0 | 13 |
| Gill et al (2018) | 13 | 6 | 10 | 5 | 7 | 3 | 8 | 6 |
| Gill & Cameron (2022) | 6 | 1 | 9 | 2 | 6 | 1 | 5 | 0 |
| Hillcoat-Nallétamby (2019) | 26 | 19 | 3 | 0 | 9 | 1 | 0 | 0 |
| McWilliam et al (2007) | 3 | 3 | 0 | 3 | 3 | 10 | 0 | 0 |
| Rahja et al (2021) | 10 | 10 | 6 | 2 | 11 | 5 | 5 | 4 |
| Rowland & Joyce (2020) | 9 | 14 | 6 | 6 | 5 | 6 | 2 | 3 |
| Tymula et al (2013) | 0 | 9 | 25 | 1 | 3 | 0 | 0 | 3 |
| Wang et al (2022) | 10 | 4 | 3 | 3 | 4 | 3 | 4 | 2 |
